# Supplementary material for: Two Different Strains of Severe Fever with Thrombocytopenia Syndrome Virus (SFTSV) in North and South Osaka by Phylogenetic Analysis of Evolutionary Lineage: Evidence for Independent SFTSV Transmission
Source: Viruses. 2021 Jan 25;13(2):177. doi: 10.3390/v13020177 (PMC7911098; doi:10.3390/v13020177)
Supplement: Supplementary file 1 [file viruses-13-00177-s001.xlsx]

## Sheet: Supplementary Table
Supplementary Table . The SFTSV strains and accession numbers used in the phylogenetic analyses
Segment L (6368bases)a				Segment M (3378bases)				Segment S (1746bases)				Isolated Country	Host	Isolation source
Strain	Accession No.	Length determined if partialb		Strain	Accession No.	Length determined if partial		Strain	Accession No.	Length determined if partial
Case A ( JaOF2017-7 )-L	LC590890	6255		Case A ( JaOF2017-7 )-M	LC590891	3335		Case A ( JaOF2017-7 )-S	LC590892	1681		Japan	Homo sapiens	serum
Case B ( JaOT2018-6 )-L	LC590893	6253		Case B ( JaOT2018-6 )-M	LC590894	3335		Case B ( JaOT2018-6 )-S	LC590895	1681			Homo sapiens	serum
Cat/Miyazaki/2018	LC462235.1			Cat/Miyazaki/2018	LC462232.1			Cat/Miyazaki/2018	LC462229.1				Felis catus	serum
SPL003A	AB817980.1			SPL003A	AB817988.1			SPL003A	AB817996.1				Homo sapiens	serum
SPL004A	AB817981.1			SPL004A	AB817989.1			SPL004A	AB817997.1				Homo sapiens	serum
SPL005A	AB817982.1			SPL005A	AB817990.1			SPL005A	AB817998.1				Homo sapiens	serum
SPL030A	AB817984.1			SPL030A	AB817992.1			SPL030A	AB818000.1				Homo sapiens	serum
SPL054A	AB983498.1			SPL054A	AB985293.1			SPL054A	AB985524.1				Homo sapiens	serum
SPL057A	AB983500.1			SPL057A	AB985295.1			SPL057A	AB985526.1				Homo sapiens	serum
SPL062A	AB983502.1			SPL062A	AB985297.1			SPL062A	AB985528.1				Homo sapiens	serum
SPL071A	AB983507.1			SPL071A	AB985302.1			SPL071A	AB985533.1				Homo sapiens	serum
SPL087A	AB983515.1			SPL087A	AB985309.1			SPL087A	AB985541.1				Homo sapiens	serum
SPL100A	AB983519.1			SPL100A	AB985313.1			SPL100A	AB985545.1				Homo sapiens	serum
SPL105A	AB983521.1			SPL105A	AB985315.1			SPL105A	AB985547.1				Homo sapiens	serum
SPL117A	AB983527.1			SPL117A	AB985321.1			SPL117A	AB985553.1				Homo sapiens	serum
SPL120A	AB983528.1			SPL120A	AB985322.1			SPL120A	AB985554.1				Homo sapiens	serum
SPL129A	AB983533.1			SPL129A	AB985326.1			SPL129A	AB985559.1				Homo sapiens	serum
SPL161A	AB983534.1			SPL161A	AB985657.1	1479		SPL161A	AB985572.1				Homo sapiens	serum
YG1	AB817979.1			YG1	AB817987.1			YG1	AB817995.1				Homo sapiens	serum
AHL/China/2011	JQ670934.1			AHL/China/2011	JQ670930.1			AHL/China/2011	JQ670932.1			China	Homo sapiens	serum
AHZ/China/2011	JQ670929.1			AHZ/China/2011	JQ670931.1			AHZ/China/2011	JQ670933.1	1744			Homo sapiens	serum
BL282	MF045948.1			BL282	MF045956.1			BL282	MF045962.1	1773			Homo sapiens	serum
DanDong273	MF357029.1	6322		DanDong273	MF357015.1	3279		DanDong273	MF357022.1	1714			Homo sapiens	unknown
DanDong292	MF357030.1	6325		DanDong292	MF357016.1	3297		DanDong292	MF357023.1	1703			Homo sapiens	unknown
DS03/CHN2013	KR698346.1			DS03/CHN2013	KR698333.1			DS03/CHN2013	KR698320.1				Homo sapiens	unknown
GP1	MF045954.1			GP1	MF045961.1			GP1	MF045967.1	1773			Tick	tissue
HB2014-10	KY933695.1			HB2014-10	KY933683.1			HB2014-10	KU738906.1	1744			Homo sapiens	serum
HB2014-13	KY933697.1			HB2014-13	KY933684.1			HB2014-13	KU738908.1	1744			Homo sapiens	serum
HB2014-21	KY933700.1			HB2014-21	KY933687.1			HB2014-21	KU738911.1	1744			Homo sapiens	serum
HB2014-31	KY933707.1			HB2014-31	KY933691.1			HB2014-31	KY933678.1	1744			Homo sapiens	serum
HB2014-35	KY933704.1			HB2014-35	KY933692.1			HB2014-35	KY933679.1	1744			Homo sapiens	serum
HB2015-19	MK513912.1	6366		HB2015-19	MK513911.1			HB2015-19	MK513910.1	1744			Homo sapiens	serum
HB2015-28	MK513921.1			HB2015-28	MK513920.1			HB2015-28	MK513919.1	1744			Homo sapiens	serum
HB2016-016	KY965113.1			HB2016-016	KY965095.1	3222		HB2016-016	KY965078.1	1744			Homo sapiens	serum
HB2016-034	KY965116.1			HB2016-034	KY965098.1			HB2016-034	KY965081.1	1744			Homo sapiens	serum
HB2017-02	MK524353.1			HB2017-02	MK524352.1			HB2017-02	MK524351.1	1745			Homo sapiens	serum
HB29	HM745930.1			HB29	HM745931.1			HB29	HM745932.1	1744			Homo sapiens	serum
HBGS13_human_2015	KY440774.1			HBGS13_human_2015	KY440773.1			HBGS13_human_2015	KY440772.1	1744			Homo sapiens	serum
JS2011-027	KC505129.1			JS2011-027	KC505130.1			JS2011-027	KC505131.1	1744			Homo sapiens	serum
JS2011-92	KY362300.1			JS2011-92	KY362348.1	3379		JS2011-92	KY362324.1	1744			Homo sapiens	serum
JS2012-goat01	KC473537.1			JS2012-goat01	KC473538.1			JS2012-goat01	KC473539.1	1744			Goat	unknown
JS2013-69	KR230756.1			JS2013-69	KR230776.1	3379		JS2013-69	KR230796.1	1744			Homo sapiens	serum
JS2014-06	KY362315.1			JS2014-06	KY362363.1	3379		JS2014-06	KY362339.1	1744			Homo sapiens	serum
JS2014-33	KR230763.1			JS2014-33	KR230783.1	3379		JS2014-33	KR230803.1	1744			Homo sapiens	serum
JS2014-H.longicornis-03	KR230767.1			JS2014-H.longicornis-03	KR230787.1	3379		JS2014-H.longicornis-03	KR230807.1	1744			Haemaphysalis longicornis	serum
JS2015-69	KY362308.1			JS2015-69	KY362356.1	3379		JS2015-69	KY362356.1	1744			Homo sapiens	serum
JS4/China/2010	HQ141604.1			JS4/China/2010	HQ141605.1			JS4/China/2010	HQ141606.1	1744			Homo sapiens	serum
LN2012-14	KF887441.1			LN2012-14	KF887436.1			LN2012-14	KF887431.1	1744			Homo sapiens	serum
NB31/CHN/2013	KR698351.1			NB31/CHN/2013	KR698338.1			NB31/CHN/2013	KR698325.1	1744			Homo sapiens	unknown
SD4/China/2010	HM802202.1			SD4/China/2010	HM802203.1			SD4/China/2010	HM802204.1	1744			Homo sapiens	serum
SDYY104/China/2011	KU239114.1			SDYY104/China/2011	KU239112.1			SDYY104/China/2011	KU239113.1	1744			Homo sapiens	serum
SFTSV2015YL20X	MF574211.1			SFTSV2015YL20X	MF574212.1			SFTSV2015YL20X	MF574213.1	1745			Yellow weasel	heart
TaiAn038	MF357033.1	6309		TaiAn038	MF357019.1	3263		TaiAn038	MF357026.1	1690			Homo sapiens	unknown
ZJ2014-01	KY273266.1			ZJ2014-01	KY273270.1			ZJ2014-01	KY273274.1	1745			Homo sapiens	unknown
ZJZHSH-WSH/China/08/2012	KR017835.1			ZJZHSH-WSH/China/08/2012	KR017854.1			ZJZHSH-WSH/China/08/2012	KR017816.1	1724			Homo sapiens	serum
ZJZHSH-YJX/China/06/2012	KR017841.1			ZJZHSH-YJX/China/06/2012	KR017860.1			ZJZHSH-YJX/China/06/2012	KR017822.1	1724			Homo sapiens	serum
zjzs02	KC189855.1	5187		zjzs02	KC189856.1	2952		zjzs02	KC189857.1	1376			Homo sapiens	blood
16KS10	MF094730.1			16KS10	MF094755.1			16KS10	MF094780.1	1745		Korea	Homo sapiens	serum
16KS24	MF094738.1			16KS24	MF094763.1			16KS24	MF094788.1	1745			Homo sapiens	serum
16KS26	MF094739.1			16KS26	MF094764.1			16KS26	MF094789.1	1745			Homo sapiens	serum
16KS40	MF094745.1			16KS40	MF094770.1			16KS40	MF094795.1	1745			Homo sapiens	serum
16KS45	MF094749.1			16KS45	MF094774.1			16KS45	MF094799.1	1745			Homo sapiens	serum
17WD333	MK413197.1	6351		17WD333	MK413198.1	3289		17WD333	MK413199.1	1718			Hydropotes inermis agyropus	unknown
AFMC 17-1	MH375689.1			AFMC 17-1	MH375688.1			AFMC 17-1	MH375687.1				Homo sapiens	serum
Asan	MF094804.1			Asan	MF094810.1			Asan	MF094816.1				Homo sapiens	CSF
CB1	KY789433.1			CB1	KY789436.1			CB1	KY789439.1				Homo sapiens	unknown
CB13	MK301489.1	6255		CB13	MK301490.1	3222		CB13	MK301491.1	1674			Homo sapiens	serum
CB3	KY789435.1			CB3	KY789438.1			CB3	KY789441.1				Homo sapiens	unknown
CB8	MK301486.1	6255		CB8	MK301487.1	3222		CB8	MK301488.1	1674			Homo sapiens	serum
CUK-JJ01	MH937374.1			CUK-JJ01	MH937373.1			CUK-JJ01	MH937372.1	1744			Homo sapiens	serum
Dog22	MH464252.1			Dog22	MH464251.1			Dog22	KY968712.1				Dog	blood
Gangwon/Korea/2012	KF358691.1			Gangwon/Korea/2012	KF358692.1			Gangwon/Korea/2012	KF358693.1				Homo sapiens	serum
KADGH	KU507543.1			KADGH	KU507548.1			KADGH	KU507553.1				Homo sapiens	serum
KAGBH3	MG736979.1	6255		KAGBH3	KU507561.1	3341		KAGBH3	KU507571.1	1716			Homo sapiens	serum
KAGNH	KU507545.1			KAGNH	KU507550.1			KAGNH	KU507555.1				Homo sapiens	serum
KAICH	MG736981.1	6255		KAICH	KU507565.1	3341		KAICH	KU507575.1	1716			Homo sapiens	serum
KAJNH2	KU507547.1			KAJNH2	KU507552.1			KAJNH2	KU507557.1				Homo sapiens	serum
KAUSH2	MG736985.1	6255		KAUSH2	KU507567.1	3341		KAUSH2	KU507577.1	1716			Homo sapiens	serum
KH1	MH491549.1			KH1	MH491548.1			KH1	MH491547.1				Homo sapiens	blood
KS7	MF094803.1			KS7	MF094809.1			KS7	MF094815.1	1740			Homo sapiens	serum
a; The lengths of the segments are indicated, b; the lengths are shown only if that of the strain was partially determined
a; The lengths of the segments are indicated, b; two accession numbers were assigned if the sequence of the strain was determined in fragments, c; the lengths are shown only if that of the strain was partially determined
